# Supplementary material for: Alkaline-earth-metal-ion blending enhanced mechanoluminescence of lanthanide ions in MZnOS hosts for stress sensing and anticounterfeiting
Source: Royal Society of Chemistry journal article supplement (doi:10.1039/d2tc05541d), 2023-01-01
Supplement: d2tc05541d1.pdf [file d2tc05541d1.pdf]

## Supporting Information

# **Alkaline-Earth-Metal-Ion Blending Enhanced Mechanoluminescence of Lanthanide Ion in MZnOS Host for Stress Sensing and Anticounterfeiting**

*Jingna Jia<sup>a</sup>, Dongyang Wang<sup>a</sup>, Xuwen Gao<sup>a</sup>, Yuqi Xu<sup>a</sup>, Xiaoxuan Ren<sup>a</sup> and Guizheng  
Zou<sup>\*a</sup>*

<sup>a</sup> School of Chemistry and Chemical Engineering, Shandong University, Jinan 250100, PR China

\*Corresponding authors at: Tel: +86 531 88361326

E-mail address: [zouguizheng@sdu.edu.cn](mailto:zouguizheng@sdu.edu.cn)

## Table of Contents

### 1. Experimental section

#### 1.1 Materials and reagents

#### 1.2 Apparatus and optical measurements

#### 1.3 ML Sample preparation.

### 2. Results and discussion

#### 2.1 XRD patterns for typical $\text{Ca}_{1-x}\text{Sr}_x\text{ZnOS}$ host and $\text{Ca}_{0.96-x}\text{Sr}_x\text{ZnOS:Er}_{0.04}$

#### 2.2 EDX mapping characterization of $\text{Ca}_{0.66}\text{Sr}_{0.3}\text{ZnOS:Er}_{0.04}$

#### 2.3 PL lifetime properties of $\text{Ca}_{0.66}\text{Sr}_{0.3}\text{ZnOS:Er}_{0.04}$

#### 2.4 ML repeated properties

#### 2.5 CIE Coordinates

#### 2.6 ML spectrum for mixture of $\text{Ca}_{0.66}\text{Sr}_{0.3}\text{ZnOS:Er}_{0.04}$ and $\text{Ca}_{0.66}\text{Sr}_{0.3}\text{ZnOS:Dy}_{0.04}$

## 1. Experimental Section

### 1.1 Materials and reagents

All reagents are of analytical grade and used as received.  $\text{CaCO}_3$  (AR, 99%, Aladdin),  $\text{ZnS}$  (99.99% metals basis, Aladdin),  $\text{SrCO}_3$  (AR, 99%, Aladdin),  $\text{REF}_3$  ( $\text{RE}=\text{Er}^{3+}$ ,  $\text{Dy}^{3+}$ ,  $\text{Sm}^{3+}$ ,  $\text{Yb}^{3+}$ ) (99% metals basis, Aladdin),  $\text{LiNO}_3$  (99% metals basis, Aladdin).

### 1.2 Apparatus and optical measurements

PL spectra are recorded on an FLS920 fluorescence spectrometer (Edinburgh Instruments, U.K.). SEM spectrum are carried out on high resolution field emission scanning electron microscope (JSM-7800F, SU8010). EDX measurements are carried out on a multifunctional imaging electron spectrometer (Bruker Nano GmbH Berlin, Germany). XRD patterns are recorded on an X-ray diffractometer (Bruker AXS D8 Advance, Germany) with Cu K $\alpha$  radiation ( $\lambda=1.5418 \text{ \AA}$ ). ML spectra are acquired by a Pixis400BR CCD (Princeton Instruments) coupled with IsoPlane160 monochromator. TL curves were collected on a YULI instrument (TOSL-3DS) in the temperature range from RT to 575 K at a heating rate of 1 K/s after pre-excitation under 365 nm for about 5 min..

### 1.3 ML Sample preparation

All the ML samples are prepared via a solid-state reaction at high temperature.<sup>1</sup> After grounding the precursors into powders in an agate mortar, the precursor are calcined powders at 1000 °C for 4 hours under Ar atmosphere (purity, 99.99%). The sintered products were cooled to room temperature in the furnace and grounded into powders to achieve ML samples.

The binary host of (Ca, Sr)ZnOS samples, i.e.  $\text{Ca}_{1-x}\text{Sr}_x\text{ZnOS}$ , were prepared with  $\text{ZnS}$ ,  $\text{CaCO}_3$ , and  $\text{SrCO}_3$  as precursors and  $\text{LiNO}_3$  as fluxing agent. The lanthanide-ions activated binary host (Ca, Sr)ZnOS, i.e.  $\text{Ca}_{0.96-x}\text{Sr}_x\text{ZnOS}:\text{RE}_{0.04}$ , were prepared with  $\text{ZnS}$ ,  $\text{CaCO}_3$ ,  $\text{SrCO}_3$ ,  $\text{REF}_3$  ( $\text{RE}=\text{Er}^{3+}$ ,  $\text{Dy}^{3+}$ ,  $\text{Sm}^{3+}$ ,  $\text{Yb}^{3+}$ ) as precursors and  $\text{LiNO}_3$  as fluxing agent. Typically,  $\text{Ca}_{0.66}\text{Sr}_{0.30}\text{ZnOS}:\text{Er}_{0.04}$  is prepared with a precursor molar

ratio Ca:Sr:Zn:Er of 0.66:0.30:1.00:0.04.

Both unary CaZnOS and SrZnOS samples were prepared in a similar way without precursor of either SrCO<sub>3</sub> or CaCO<sub>3</sub>.

The ML samples were mixed with polydimethylsiloxane (PDMS) at a weight ratio of 5:1, and place in the mold at 80 °C for 2 hours to form right circular cylinder composites with a diameter of 10 mm and a thickness of 1 mm for the ML measurement.

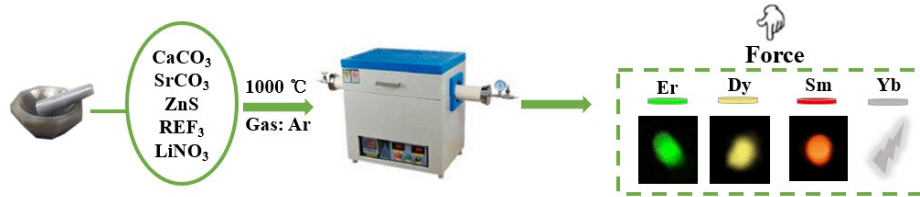

**Scheme 1** The schematic diagram of synthesis method.

## 2. Results and discussion

### 2.1 XRD patterns for typical Ca<sub>1-x</sub>Sr<sub>x</sub>ZnOS host and Ca<sub>0.96-x</sub>Sr<sub>x</sub>ZnOS:Er<sub>0.04</sub>

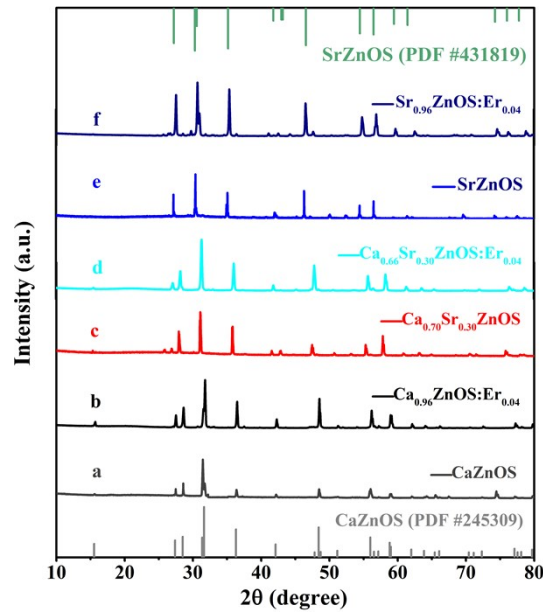

**Fig. S1** XRD patterns of Ca<sub>1-x</sub>Sr<sub>x</sub>ZnOS ( $x=0, 0.3, 1$ ) and Ca<sub>0.96-x</sub>Sr<sub>x</sub>ZnOS:Er<sub>0.04</sub> ( $x=0, 0.3, 0.96$ ).

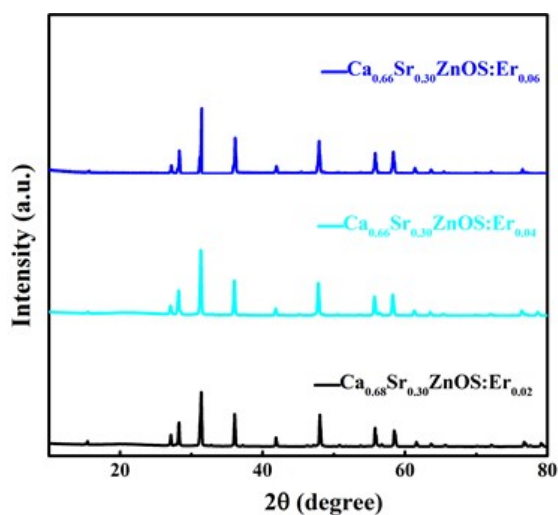

Fig. S2 XRD patterns of  $\text{Ca}_{0.70-y}\text{Sr}_{0.30}\text{ZnOS:Er}_y$  ( $x=0.02, 0.04, 0.06$ ).

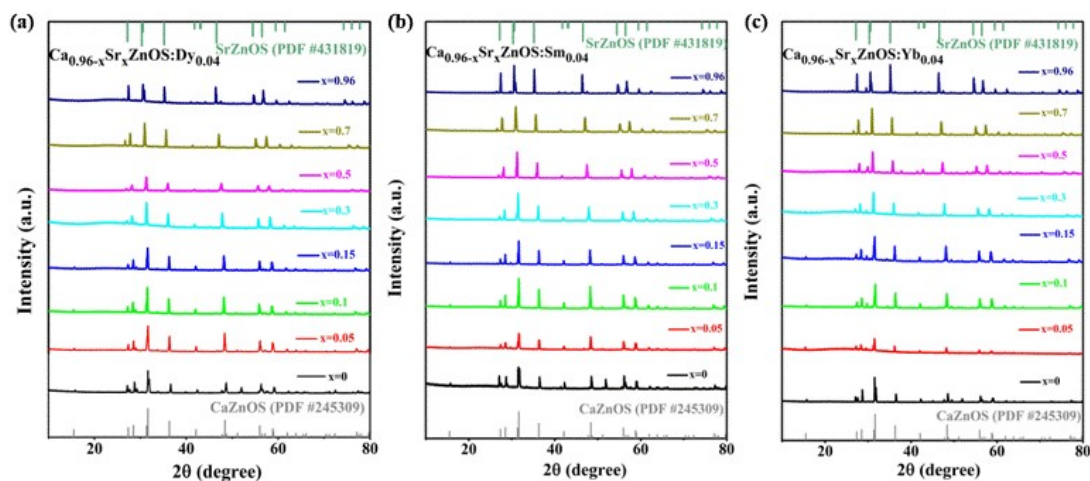

Fig. S3 XRD patterns of  $\text{Ca}_{0.96-x}\text{Sr}_x\text{ZnOS:RE}_{0.04}$  ( $\text{RE}=\text{Dy}^{3+}, \text{Sm}^{3+}, \text{Yb}^{3+}$ ).

## 2.2 EDX mapping characterization of $\text{Ca}_{0.66}\text{Sr}_{0.3}\text{ZnOS:Er}_{0.04}$

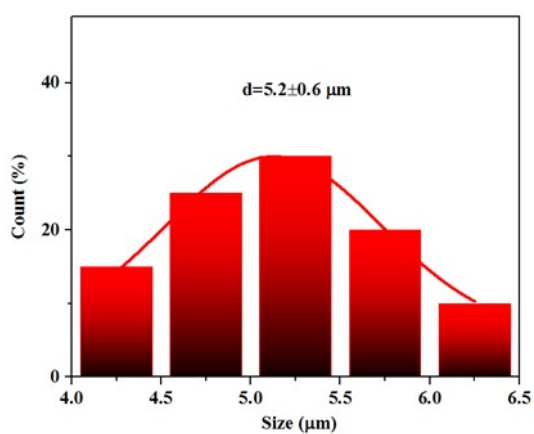

Fig. S4 The size distribution analysis of  $\text{Ca}_{0.66}\text{Sr}_{0.30}\text{ZnOS:Er}_{0.04}$ .

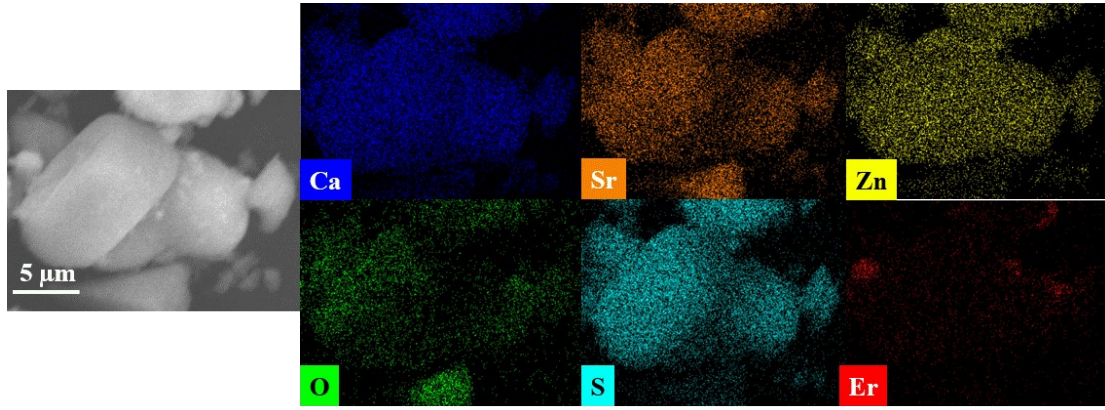

Fig. S5 The EDX mapping diagrams of  $\text{Ca}_{0.66}\text{Sr}_{0.3}\text{ZnOS}:\text{Er}_{0.04}$ .

Table S1. Composition of  $\text{Ca}_{0.66}\text{Sr}_{0.3}\text{ZnOS}:\text{Er}_{0.04}$  determined by EDS

| Element | Atom(%) |
|---------|---------|
| Ca      | 17.71   |
| Sr      | 7.56    |
| Zn      | 24.26   |
| O       | 25.23   |
| S       | 24.29   |
| Er      | 0.95    |

### 2.3 PL lifetime properties of $\text{Ca}_{0.66}\text{Sr}_{0.3}\text{ZnOS}:\text{Er}_{0.04}$

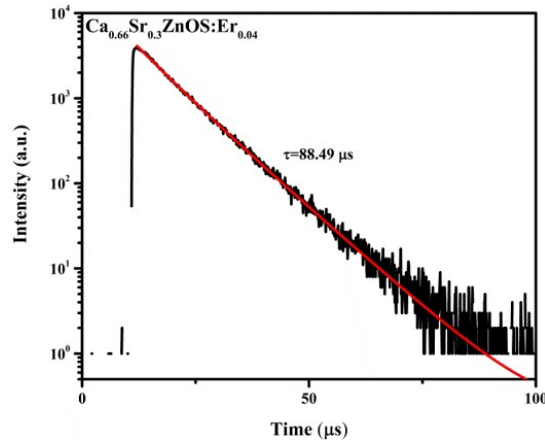

Fig. S6 PL decay curves of  $\text{Ca}_{0.66}\text{Sr}_{0.3}\text{ZnOS}:\text{Er}_{0.04}$ .

Table S2 PL lifetime parameters of  $\text{Ca}_{0.66}\text{Sr}_{0.3}\text{ZnOS}:\text{Er}_{0.04}$ .

| $\tau_1(\mu\text{s})/(\alpha_1)$ | $\tau_2(\mu\text{s})/(\alpha_2)$ | $\tau(\mu\text{s})$ | $\chi^2$ |
|----------------------------------|----------------------------------|---------------------|----------|
| 65.61/(28.56%)                   | 94.83/(71.44%)                   | 88.49               | 1.01     |

## 2.4 ML repeated properties

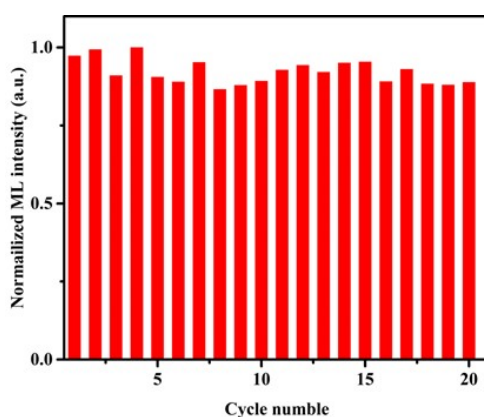

**Fig. S7** ML repeatability of  $\text{Ca}_{0.66}\text{Sr}_{0.30}\text{ZnOS:Er}_{0.04}$  film upon repetitive mechanical excitation at 25 N.

## 2.5 CIE Coordinates

**Table S3.** CIE Coordinates of  $\text{Ca}_{0.66}\text{Sr}_{0.3}\text{ZnOS:RE}$  (RE= $\text{Er}^{3+}$ ,  $\text{Dy}^{3+}$ ,  $\text{Sm}^{3+}$ ).

| Samples  | x      | y      |
|----------|--------|--------|
| G        | 0.2947 | 0.6707 |
| G:O(1:1) | 0.4349 | 0.5031 |
| O        | 0.4752 | 0.4409 |
| R        | 0.6169 | 0.3573 |

## 2.6 ML spectrum for mixture of $\text{Ca}_{0.66}\text{Sr}_{0.3}\text{ZnOS:Er}_{0.04}$ and $\text{Ca}_{0.66}\text{Sr}_{0.3}\text{ZnOS:Dy}_{0.04}$

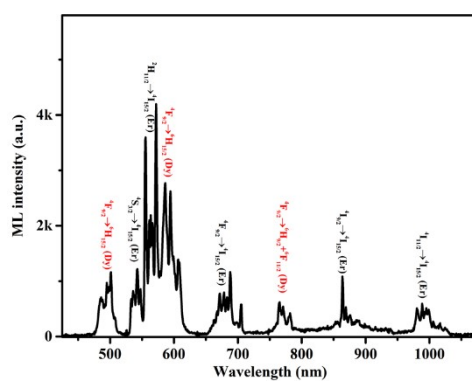

**Fig. S8** ML spectrum for the mixture of  $\text{Ca}_{0.66}\text{Sr}_{0.3}\text{ZnOS:Er}_{0.04}$  and  $\text{Ca}_{0.66}\text{Sr}_{0.3}\text{ZnOS:Dy}_{0.04}$  at 1:1 level.

## Notes and references

1. J. Jia, X. Gao and G. Zou, *Adv. Funct. Mater.*, 2022, **32**, 2207881.
